# Supplementary material
Source: Springer Nature journal article supplement (https://www.springermedizin.de/resource/supplementary/12889_2011_4270_MOESM3_ESM.pdf/9491350)

## Agenda

### **PROBLEM = Chlamydia:**

Common &  
diagnoses rising  
Asymptomatic  
Harms health  
Costs money

### **SOLUTION = Technology:**

New & better  
diagnostic tests  
Single dose  
antibiotics

### **PROBLEM = sexual health in young people:**

STIs & teenage  
pregnancy rising  
Services in crisis

**SOLUTION =**  
Improve sexual  
health services

## Policy choice

### **Screening**

Delivered using  
opportunistic model  
x

### Screening = vehicle

↑ access to services &  
engage young people in  
sexual health

### **Sexual health service change:**

Integration &  
expansion into  
primary care

## Desired outcomes

↓ Chlamydia  
↓ Health problems  
**Saves money**

**Better sexual  
health**

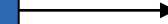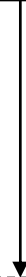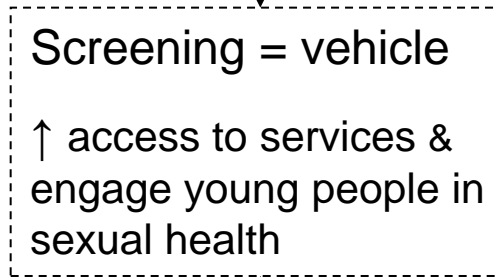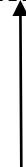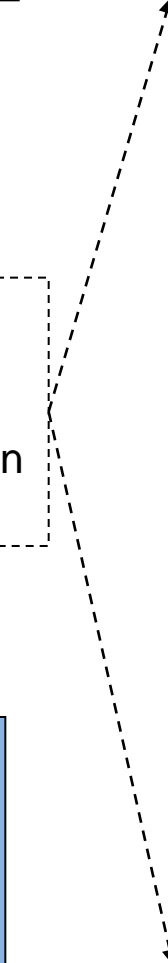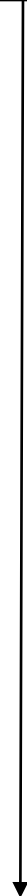

Supplement: MOESM3 [file 9491350]
